# Supplementary material for: PD-L1 has distinct functions in hematopoietic and nonhematopoietic cells in regulating T cell responses during chronic infection in mice
Source: JCI journal article supplement (doi:10.1172/jci40040), 2010-06-16
Supplement: sd1 [file 1]

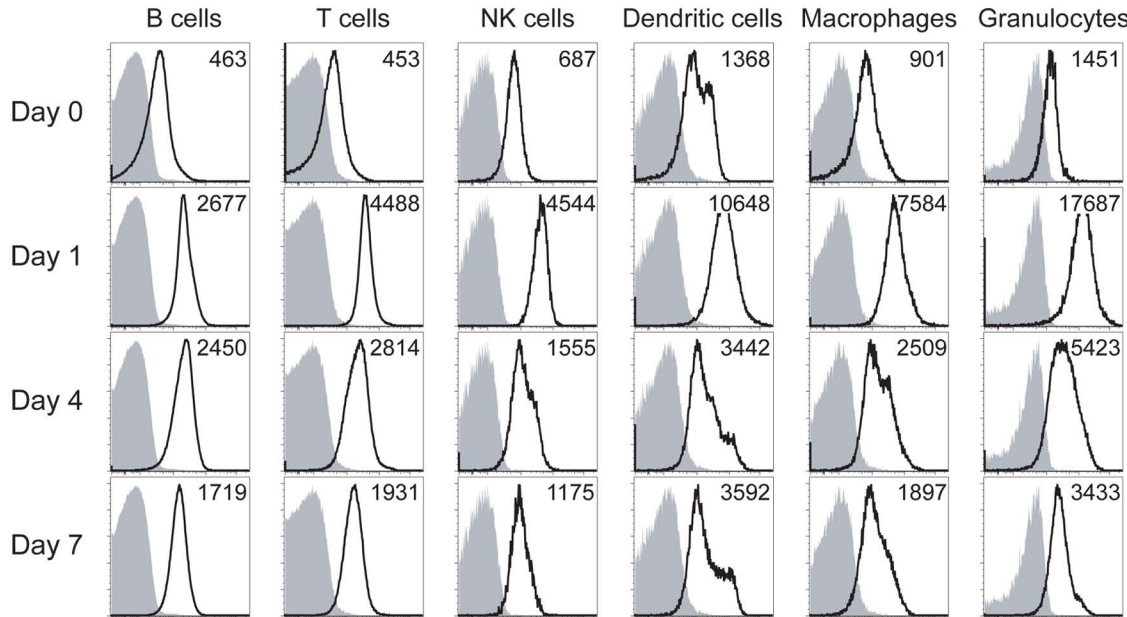

**Supplemental Figure 1.** Expression of PD-L1 on bone-marrow derived cells after LCMV CL-13 infection. Splenocytes were isolated from uninfected C57BL/6 mice (day 0) and from infected mice on days 1, 4, and 7 after infection. Specific subsets of cells were defined as follows: B cells, CD3-CD19+B220+; T cells, CD3+CD19-B220-; NK cells, CD3-NK1.1+DX5+; Dendritic cells, CD11c+CD3-CD19-; macrophages, CD11bhiF4/80+Gr-1int; granulocytes, CD11bhiGr-1hiF4/80-. Open histograms, PD-L1; gray histograms, isotype control staining. Numbers in plots indicate the mean fluorescence intensity of PD-L1 staining. Data are representative of 2-3 independent experiments.

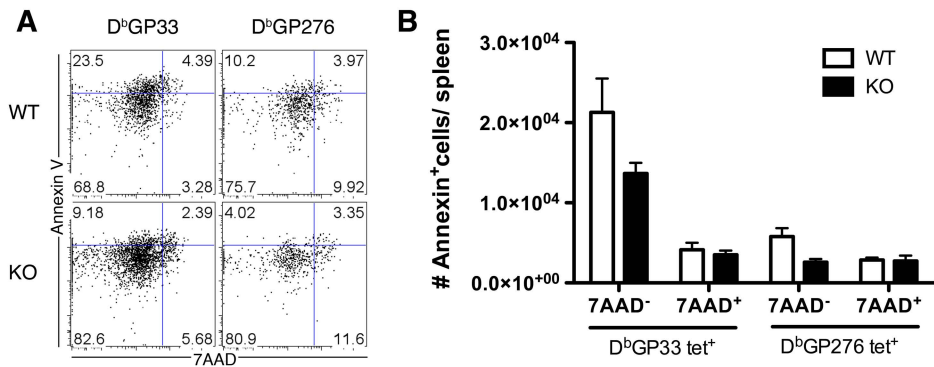

**Supplemental Figure 2. (A)** Annexin V and 7AAD staining on D<sup>b</sup>GP33- and DbGP276-tetramer positive CD8 T cells in the spleen of WT or PD-L1<sup>-/-</sup> mice 6 days after LCMV CL-13 infection. **(B)** Numbers of cells in the spleen staining for Annexin V and 7AAD. n = 3 mice per group. One representative experiment of two is shown.

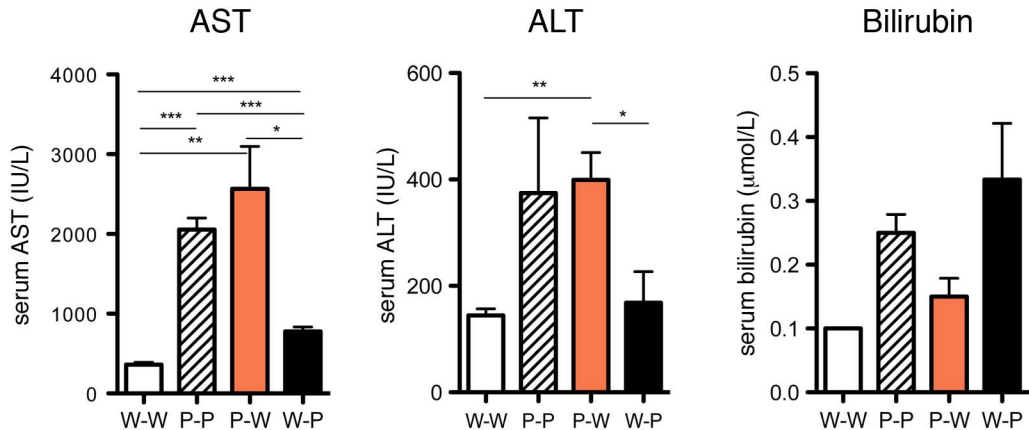

**Supplemental Figure 3.** Serum aminotransferase and bilirubin levels in bone-marrow chimeric mice after infection. The levels of the liver enzymes aspartate aminotransferase (AST), alanine aminotransferase (ALT) and bilirubin were measured in serum from BM chimeric mice 8 days after LCMV CL-13 infection. N = 4 mice per group. \*,  $P \leq 0.05$ ; \*\*,  $P \leq 0.01$ ; \*\*\*,  $P \leq 0.001$ .

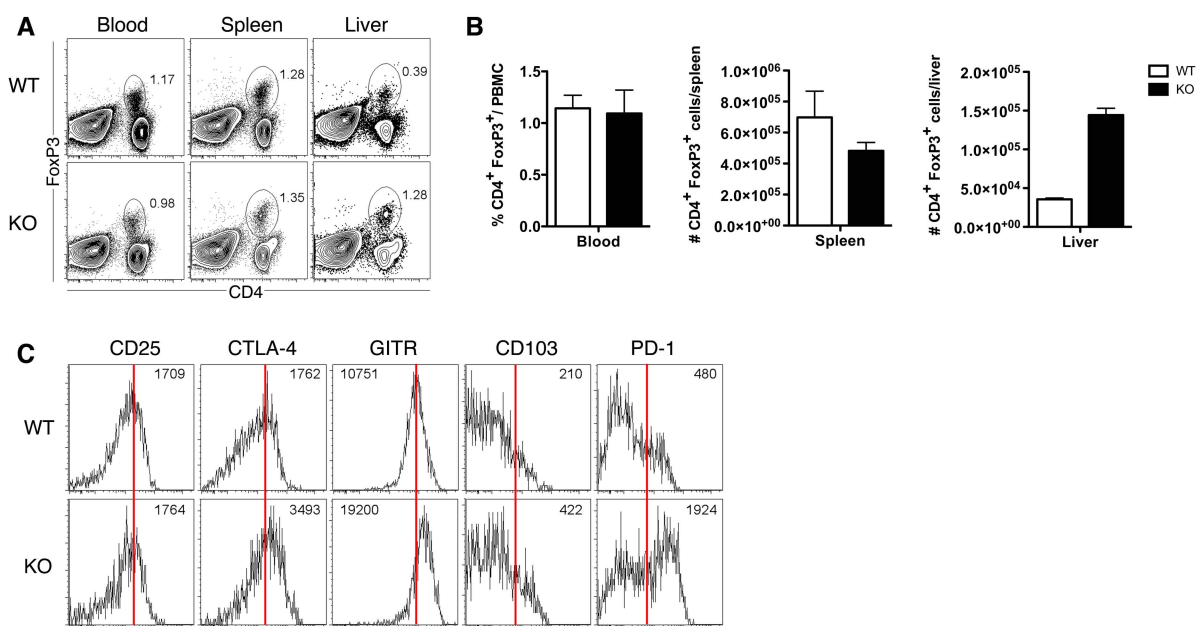

**Supplemental Figure 4.** Analysis of Treg cells in PD-L1<sup>-/-</sup> mice after LCMV CL-13 infection.

(A) Example of regulatory T cells from the blood, spleen and liver from WT or PD-L1<sup>-/-</sup> (KO) mice, stained with CD4 and FoxP3 antibodies. (B) Percent or numbers of Treg cells in the indicated tissues 6 days after LCMV CL-13 infection. (C) Expression of CD25, CTLA-4, GITR, CD103 and PD-1 on the isolated Treg cells from the spleen of WT or PD-L1<sup>-/-</sup> (KO) mice. Numbers in the upper right represent mean fluorescence intensity of staining. Red lines are set on the mean of expression on WT cells to demonstrate increased staining of KO cells. *n* = 3 mice per group. One representative experiment of two is shown.
